# Supplementary material for: Monocyte to high-density lipoprotein ratio as biomarker for cardiovascular health and cognitive function in the elderly diabetic and non- diabetic population: a case control study
Source: Research Square preprint supplement (doi:10.21203/rs.3.rs-4882822/v1), 2024-10-11
Supplement: Supplementary file 1 [file c1e4e3e7c788112de67e8e00.docx]

**Table 1** Characteristics of participants

|  | | **Diabetic cases** | | **Control** | | **P value** |
| --- | --- | --- | --- | --- | --- | --- |
| **Count** | **%** | **Count** | **%** |
| **Gender** | **Male** | 24 | 48.0% | 31 | 62.0% | 0.159 |
| **Female** | 26 | 52.0% | 19 | 38.0% |
| **Education level** | **illiterate** | 31 | 62.0% | 32 | 64.0% | 1 |
| **elementary education** | 8 | 16.0% | 7 | 14.0% |
| **High school** | 7 | 14.0% | 6 | 12.0% |
| **college** | 4 | 8.0% | 5 | 10.0% |
| **HTN** | **yes** | 23 | 46.0% | 12 | 24.0% | 0.021 |
| **No** | 27 | 54.0% | 38 | 76.0% |
| **Diabetes treatment** | **insulin** | 23 | 46.0% | 0 | 0.0% | ----- |
| **insulin+SU** | 2 | 4.0% | 0 | 0.0% |
| **metformin** | 10 | 20.0% | 0 | 0.0% |
| **SU** | 12 | 24.0% | 0 | 0.0% |
| **SGLT2** | 2 | 4.0% | 0 | 0.0% |
| **SGLT2+metformin** | 1 | 2.0% | 0 | 0.0% |
| **FH of CVD** | **yes** | 0 | 0.0% | 2 | 4.0% | 0.495 |
| **No** | 50 | 100.0% | 48 | 96.0% |
| **Smoking** | **yes** | 6 | 12.0% | 8 | 16.0% | 0.564 |
| **No** | 44 | 88.0% | 42 | 84.0% |

**Table 2** Characteristics of participants

|  | **Diabetic cases** | | | | | **Control** | | | | | **P value** |
| --- | --- | --- | --- | --- | --- | --- | --- | --- | --- | --- | --- |
| **Mean** | **SD** | **Median** | **Minimum** | **Maximum** | **Mean** | **SD** | **Median** | **Minimum** | **Maximum** |  |
| **Age** | 67.52 | 6.14 | 66.50 | 60.00 | 83.00 | 66.88 | 7.50 | 64.00 | 60.00 | 93.00 | 0.642 |
| **BMI** | 29.87 | 5.03 | 28.50 | 21.20 | 47.50 | 27.49 | 6.13 | 27.00 | 14.70 | 43.00 | 0.036 |
| **Diabetes duration** | 10.94 | 6.87 | 10.00 | 1.00 | 30.00 | . | . | . | . | . | ----- |
| **ACR (mg/g)** | 138.13 | 187.21 | 42.00 | 3.80 | 875.00 | . | . | . | . | . | ----- |
| **HbA1C** | 8.03 | 1.93 | 7.90 | 5.10 | 14.50 | . | . | . | . | . | ----- |
| **2 hrs pp** | 225.24 | 82.01 | 206.50 | 84.00 | 458.00 | . | . | . | . | . | ----- |
| **FPG** | 175.64 | 78.29 | 176.00 | 82.00 | 540.00 | . | . | . | . | . | ----- |
| **smoking index** | 198.00 | 673.25 | 0.00 | 0.00 | 4000.00 | 224.00 | 604.59 | 0.00 | 0.00 | 2500.00 | 0.579 |
| **Urea** | 66.48 | 45.09 | 60.00 | 19.00 | 214.00 | 59.44 | 35.80 | 47.50 | 17.00 | 161.00 | 0.533 |
| **Creatinin** | 1.29 | 0.70 | 1.18 | 0.60 | 3.50 | 1.33 | 0.84 | 1.00 | 0.40 | 3.90 | 0.581 |
| **Egfr** | 70.68 | 25.87 | 74.00 | 18.60 | 140.00 | 74.00 | 34.84 | 77.85 | 17.00 | 170.00 | 0.632 |
| **Creat clearance** | 73.53 | 27.16 | 76.50 | 20.00 | 128.00 | 82.05 | 36.22 | 87.50 | 18.00 | 206.00 | 0.276 |
| **AST** | 43.88 | 76.23 | 21.50 | 6.00 | 493.00 | 31.64 | 35.97 | 20.00 | 9.00 | 248.00 | 0.918 |
| **ALT** | 35.24 | 41.34 | 21.00 | 9.00 | 234.00 | 29.62 | 24.27 | 22.00 | 7.00 | 173.00 | 0.588 |
| **Monocyte** | 0.58 | 0.38 | 0.55 | 0.16 | 2.30 | 0.51 | 0.31 | 0.45 | 0.11 | 1.46 | 0.396 |
| **HDL(mmol/l)** | 1.70 | 0.68 | 1.66 | 0.55 | 4.05 | 1.75 | 0.73 | 1.77 | 0.25 | 3.69 | 0.438 |
| **MHR** | 0.37 | 0.28 | 0.29 | 0.06 | 1.50 | 0.32 | 0.23 | 0.24 | 0.11 | 1.20 | 0.191 |
| **TC** | 166.40 | 51.85 | 175.00 | 31.00 | 320.00 | 180.16 | 56.80 | 180.00 | 84.00 | 332.00 | 0.209 |
| **LDL** | 78.92 | 43.25 | 68.00 | 11.00 | 276.00 | 98.64 | 36.21 | 97.00 | 40.00 | 190.00 | 0.015 |
| **VLDL** | 28.88 | 6.71 | 28.00 | 20.00 | 45.00 | 29.86 | 10.15 | 30.00 | 7.00 | 60.00 | 0.570 |
| **TG** | 164.06 | 69.74 | 170.00 | 61.00 | 396.00 | 148.42 | 79.01 | 131.00 | 35.00 | 540.00 | 0.297 |
| **Carotid plaque (mm)** | 1.04 | 0.13 | 1.10 | 0.70 | 1.20 | 1.02 | 0.12 | 1.05 | 0.65 | 1.30 | 0.441 |
| **carotid femoral PWV (m/sec)** | 12.25 | 4.64 | 11.65 | 4.70 | 23.60 | 11.63 | 4.39 | 10.49 | 5.80 | 25.80 | 0.498 |
| **MSE (/100)** | 76.52 | 16.99 | 79.00 | 32.00 | 100.00 | 75.14 | 18.09 | 80.00 | 40.00 | 100.00 | 0.695 |

**Table 3** Correlation between MHR, Carotid intima-media thickness, Carotid femoral PWV & 3MS test in group I

| **Diabetic cases** | | **Carotid intima-media thickness (mm)** | **carotid femoral PWV (m/sec)** | **3MS (/100)** |
| --- | --- | --- | --- | --- |
| **MHR** | **Correlation Coefficient*** | 0.089 | 0.265 | -0.353- |
| **P value** | 0.539 | 0.063 | 0.012 |
| **N** | 50 | 50 | 50 |
| **Carotid intima-media thickness (mm)** | **Correlation Coefficient** | 1.000 | 0.102 | -0.264- |
| **P value** | . | 0.482 | 0.064 |
| **N** | 50 | 50 | 50 |
| **carotid femoral PWV (m/sec)** | **Correlation Coefficient** | 0.102 | 1.000 | -0.453- |
| **P value** | 0.482 | . | 0.001 |
| **N** | 50 | 50 | 50 |

**Table 4** Correlation between MHR, Carotid intima-media thickness, Carotid femoral PWV & 3MS test in group II

| **Control** | | **Carotid intima-media thickness (mm)** | **carotid femoral PWV (m/sec)** | **3MS (/100)** |
| --- | --- | --- | --- | --- |
| **MHR** | **Correlation Coefficient** | 0.142 | 0.087 | -0.170- |
| **P value** | 0.324 | 0.550 | 0.238 |
| **N** | 50 | 50 | 50 |
| **Carotid intima-media thickness (mm)** | **Correlation Coefficient** | 1.000 | 0.223 | -0.322- |
| **P value** | . | 0.119 | 0.023 |
| **N** | 50 | 50 | 50 |
| **carotid femoral PWV (m/sec)** | **Correlation Coefficient** | 0.223 | 1.000 | -0.080- |
| **P value** | 0.119 | . | 0.583 |
| **N** | 50 | 50 | 50 |

***.***

**Table 5** Correlation of different variables with MHR, pwv, carotid plaque and MSE in group I

| **Diabetic cases** | | **MHR** | **Carotid plaque (mm)** | **carotid femoral PWV (m/sec)** | **MSE (/100)** |
| --- | --- | --- | --- | --- | --- |
| **Age** | **Correlation Coefficient** | 0.053 | 0.109 | 0.157 | -0.227- |
| **P value** | 0.714 | 0.453 | 0.276 | 0.113 |
| **N** | 50 | 50 | 50 | 50 |
| **BMI** | **Correlation Coefficient** | -0.115- | -0.111- | 0.231 | -0.201- |
| **P value** | 0.425 | 0.445 | 0.106 | 0.161 |
| **N** | 50 | 50 | 50 | 50 |
| **Diabetes duration** | **Correlation Coefficient** | 0.090 | 0.299 | 0.165 | -0.205- |
| **P value** | 0.533 | 0.035 | 0.252 | 0.152 |
| **N** | 50 | 50 | 50 | 50 |
| **ACR (mg/g)** | **Correlation Coefficient** | 0.327 | 0.266 | 0.293 | -0.389- |
| **P value** | 0.020 | 0.062 | 0.039 | 0.005 |
| **N** | 50 | 50 | 50 | 50 |
| **HbA1C** | **Correlation Coefficient** | 0.196 | 0.013 | 0.266 | -0.143- |
| **P value** | 0.173 | 0.930 | 0.062 | 0.323 |
| **N** | 50 | 50 | 50 | 50 |
| **2 hrs pp** | **Correlation Coefficient** | -0.119- | -0.016- | 0.263 | -0.055- |
| **P value** | 0.409 | 0.911 | 0.065 | 0.704 |
| **N** | 50 | 50 | 50 | 50 |
| **FPG** | **Correlation Coefficient** | 0.082 | -0.004- | 0.365 | -0.092- |
| **P value** | 0.572 | 0.977 | 0.009 | 0.525 |
| **N** | 50 | 50 | 50 | 50 |
| **smoking index** | **Correlation Coefficient** | 0.078 | -0.083- | 0.002 | -0.050- |
| **P value** | 0.589 | 0.568 | 0.989 | 0.728 |
| **N** | 50 | 50 | 50 | 50 |
| **Urea** | **Correlation Coefficient** | 0.143 | 0.235 | -0.160- | 0.001 |
| **P value** | 0.322 | 0.101 | 0.266 | 0.995 |
| **N** | 50 | 50 | 50 | 50 |
| **Creatinin** | **Correlation Coefficient** | -0.018- | 0.127 | -0.371- | 0.129 |
| **P value** | 0.900 | 0.380 | 0.008 | 0.372 |
| **N** | 50 | 50 | 50 | 50 |
| **eGFR** | **Correlation Coefficient** | -0.115- | -0.165- | 0.265 | 0.145 |
| **P value** | 0.428 | 0.251 | 0.063 | 0.315 |
| **N** | 50 | 50 | 50 | 50 |
| **Creat clearance** | **Correlation Coefficient** | -0.154- | -0.249- | 0.286 | 0.095 |
| **P value** | 0.286 | 0.082 | 0.044 | 0.514 |
| **N** | 50 | 50 | 50 | 50 |
| **AST** | **Correlation Coefficient** | -0.081- | -0.054- | -0.353- | 0.209 |
| **P value** | 0.575 | 0.712 | 0.012 | 0.146 |
| **N** | 50 | 50 | 50 | 50 |
| **ALT** | **Correlation Coefficient** | -0.065- | 0.198 | -0.373- | 0.109 |
| **P value** | 0.656 | 0.168 | 0.008 | 0.452 |
| **N** | 50 | 50 | 50 | 50 |
| **Monocyte** | **Correlation Coefficient** | 0.754 | -0.051- | 0.206 | -0.276- |
| **P value** | <0.001 | 0.724 | 0.150 | 0.053 |
| **N** | 50 | 50 | 50 | 50 |
| **HDL(mmol/l)** | **Correlation Coefficient** | -0.451- | -0.151- | 0.056 | 0.164 |
| **P value** | 0.001 | 0.294 | 0.699 | 0.255 |
| **N** | 50 | 50 | 50 | 50 |
| **TC** | **Correlation Coefficient** | 0.349 | -0.063- | 0.285 | -0.194- |
| **P value** | 0.013 | 0.664 | 0.045 | 0.177 |
| **N** | 50 | 50 | 50 | 50 |
| **LDL** | **Correlation Coefficient** | 0.234 | 0.028 | 0.044 | -0.172- |
| **P value** | 0.101 | 0.848 | 0.764 | 0.233 |
| **N** | 50 | 50 | 50 | 50 |
| **VLDL** | **Correlation Coefficient** | 0.198 | 0.123 | 0.287 | -0.193- |
| **P value** | 0.169 | 0.396 | 0.043 | 0.179 |
| **N** | 50 | 50 | 50 | 50 |
| **TG** | **Correlation Coefficient** | 0.396 | 0.184 | 0.134 | -0.026- |
| **P value** | 0.004 | 0.201 | 0.353 | 0.860 |
| **N** | 50 | 50 | 50 | 50 |

**Table 6** Correlation of different variables with MHR, pwv, carotid plaque and MSE in group II

| **Control** | | **MHR** | **Carotid plaque (mm)** | **carotid femoral PWV (m/sec)** | **MSE (/100)** |
| --- | --- | --- | --- | --- | --- |
| **Age** | **Correlation Coefficient** | -0.144- | 0.175 | 0.073 | 0.011 |
| **P value** | 0.319 | 0.224 | 0.615 | 0.942 |
| **N** | 50 | 50 | 50 | 50 |
| **BMI** | **Correlation Coefficient** | -0.230- | 0.139 | 0.133 | 0.082 |
| **P value** | 0.108 | 0.334 | 0.357 | 0.571 |
| **N** | 50 | 50 | 50 | 50 |
| **smoking index** | **Correlation Coefficient** | 0.324 | 0.087 | -0.182- | 0.060 |
| **P value** | 0.022 | 0.546 | 0.205 | 0.678 |
| **N** | 50 | 50 | 50 | 50 |
| **Urea** | **Correlation Coefficient** | 0.184 | 0.010 | 0.329 | -0.159- |
| **P value** | 0.200 | 0.945 | 0.020 | 0.271 |
| **N** | 50 | 50 | 50 | 50 |
| **Creatinin** | **Correlation Coefficient** | 0.090 | 0.140 | 0.164 | -0.298- |
| **P value** | 0.532 | 0.333 | 0.255 | 0.036 |
| **N** | 50 | 50 | 50 | 50 |
| **eGFR** | **Correlation Coefficient** | -0.156- | -0.167- | -0.261- | 0.257 |
| **P value** | 0.279 | 0.247 | 0.067 | 0.071 |
| **N** | 50 | 50 | 50 | 50 |
| **Creat clearance** | **Correlation Coefficient** | -0.234- | -0.030- | -0.184- | 0.244 |
| **P value** | 0.102 | 0.838 | 0.201 | 0.088 |
| **N** | 50 | 50 | 50 | 50 |
| **AST** | **Correlation Coefficient** | -0.102- | 0.024 | 0.086 | -0.071- |
| **P value** | 0.479 | 0.867 | 0.554 | 0.626 |
| **N** | 50 | 50 | 50 | 50 |
| **ALT** | **Correlation Coefficient** | -0.118- | -0.072- | -0.064- | 0.135 |
| **P value** | 0.412 | 0.617 | 0.657 | 0.350 |
| **N** | 50 | 50 | 50 | 50 |
| **Monocyte** | **Correlation Coefficient** | 0.659 | 0.062 | -0.145- | -0.053- |
| **P value** | <0.001 | 0.667 | 0.315 | 0.715 |
| **N** | 50 | 50 | 50 | 50 |
| **HDL(mmol/l)** | **Correlation Coefficient** | -0.370- | -0.063- | -0.204- | 0.228 |
| **P value** | 0.008 | 0.666 | 0.155 | 0.111 |
| **N** | 50 | 50 | 50 | 50 |
| **TC** | **Correlation Coefficient** | 0.163 | -0.094- | 0.353 | 0.181 |
| **P value** | 0.258 | 0.518 | 0.012 | 0.208 |
| **N** | 50 | 50 | 50 | 50 |
| **LDL** | **Correlation Coefficient** | 0.068 | 0.007 | 0.381 | 0.139 |
| **P value** | 0.640 | 0.962 | 0.006 | 0.336 |
| **N** | 50 | 50 | 50 | 50 |
| **VLDL** | **Correlation Coefficient** | 0.277 | 0.129 | 0.355 | 0.219 |
| **P value** | 0.052 | 0.371 | 0.011 | 0.127 |
| **N** | 50 | 50 | 50 | 50 |
| **TG** | **Correlation Coefficient** | 0.168 | -0.207- | 0.272 | 0.326 |
| **P value** | 0.243 | 0.149 | 0.056 | 0.021 |
| **N** | 50 | 50 | 50 | 50 |
